# Supplementary material for: Targeting nerve growth factor, a new option for treatment of osteoarthritis: a network meta-analysis of comparative efficacy and safety with traditional drugs
Source: Aging (Albany NY). 2020 Dec 3;13(1):1051–70. doi: 10.18632/aging.202232 (PMC7835067; doi:10.18632/aging.202232)
Supplement: Supplementary Figures [file aging-13-202232-s001.pdf]

## SUPPLEMENTARY FIGURES

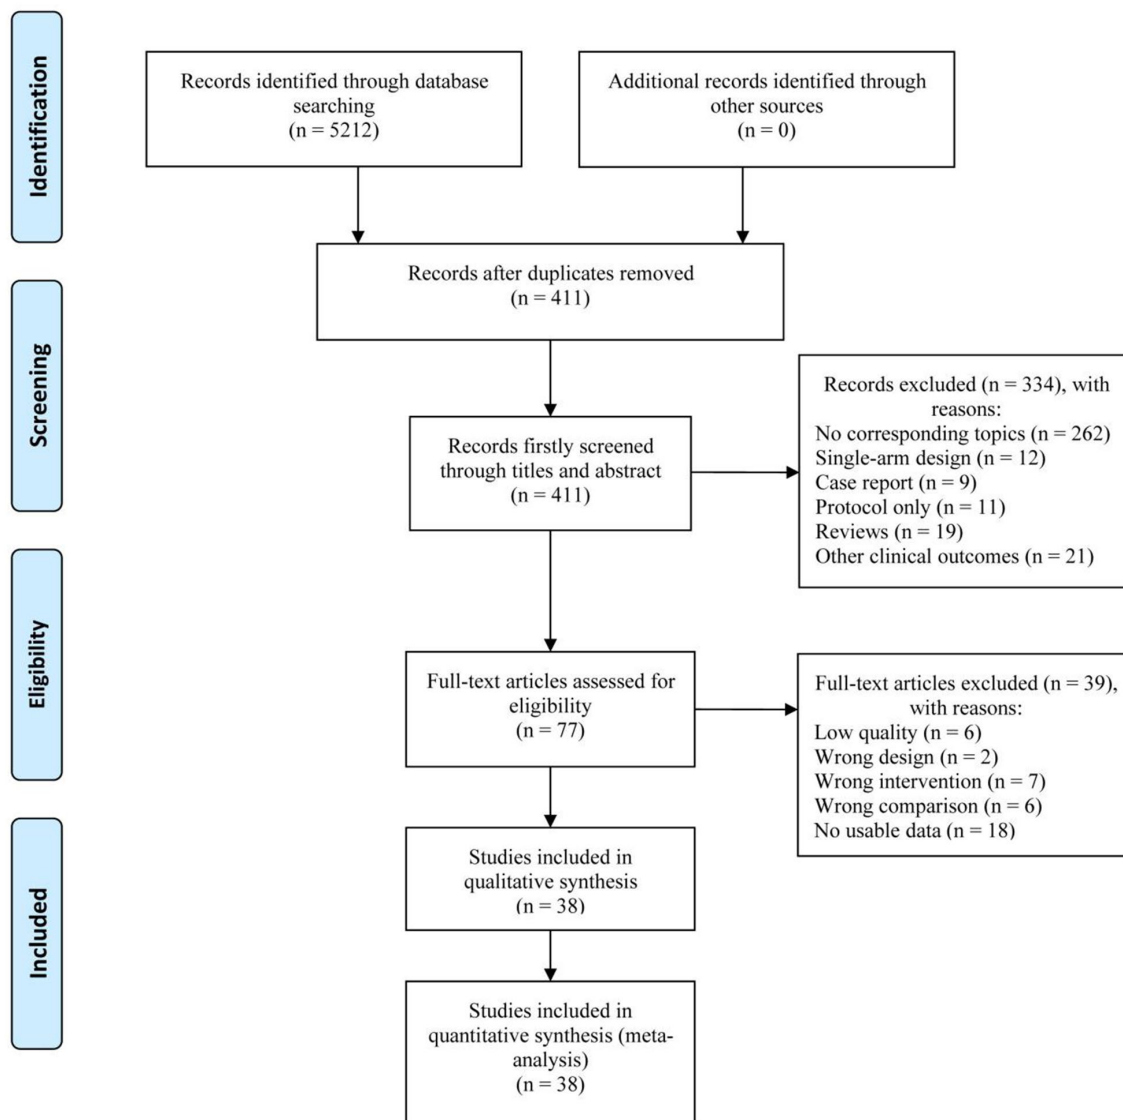

Supplementary Figure 1. PRISMA flow diagram.

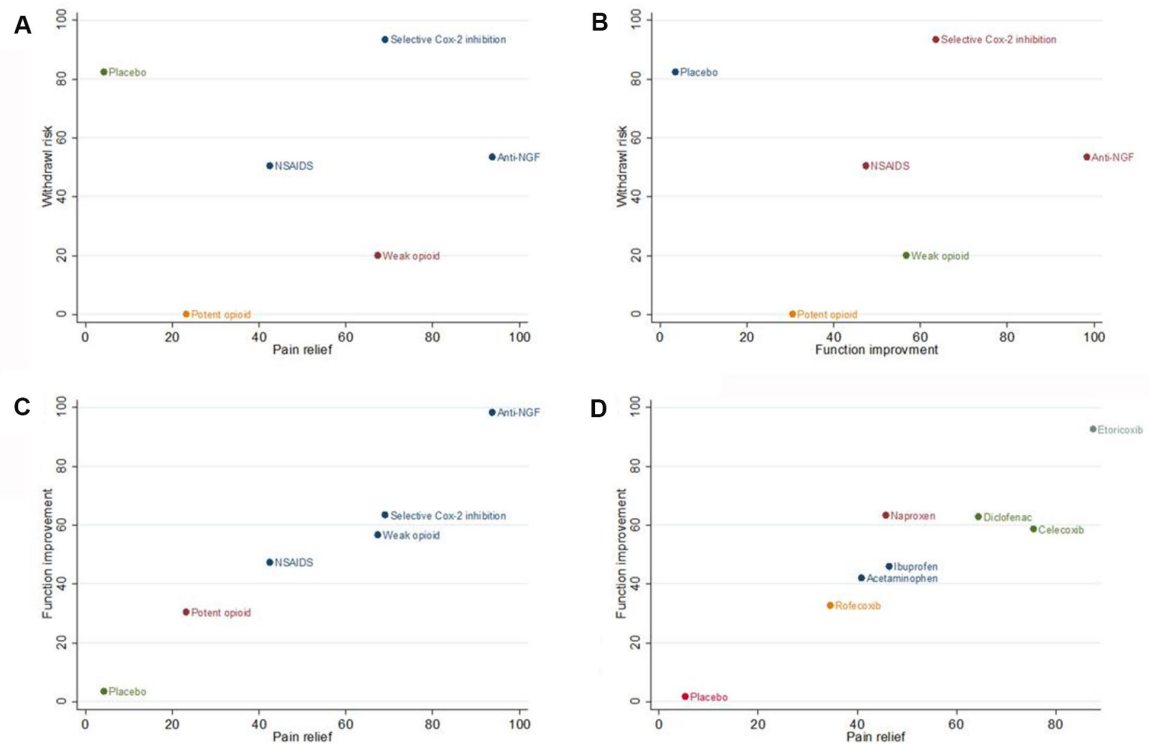

**Supplementary Figure 2. Cluster-rank plots.** (A) The cluster-rank plot of pain relief and withdrawal rate for main network meta-analysis. (B) The cluster-rank plot of function improvement and withdrawal rate for main network meta-analysis. (C) The cluster-rank plot of pain relief and function improvement for main network meta-analysis. (D) The cluster-rank plot of pain relief and function improvement for subgroup analysis comparing different selective COX-2 inhibitor and traditional NSAIDs. (The cluster-rank value is the product of the abscissa and ordinate of each treatment).

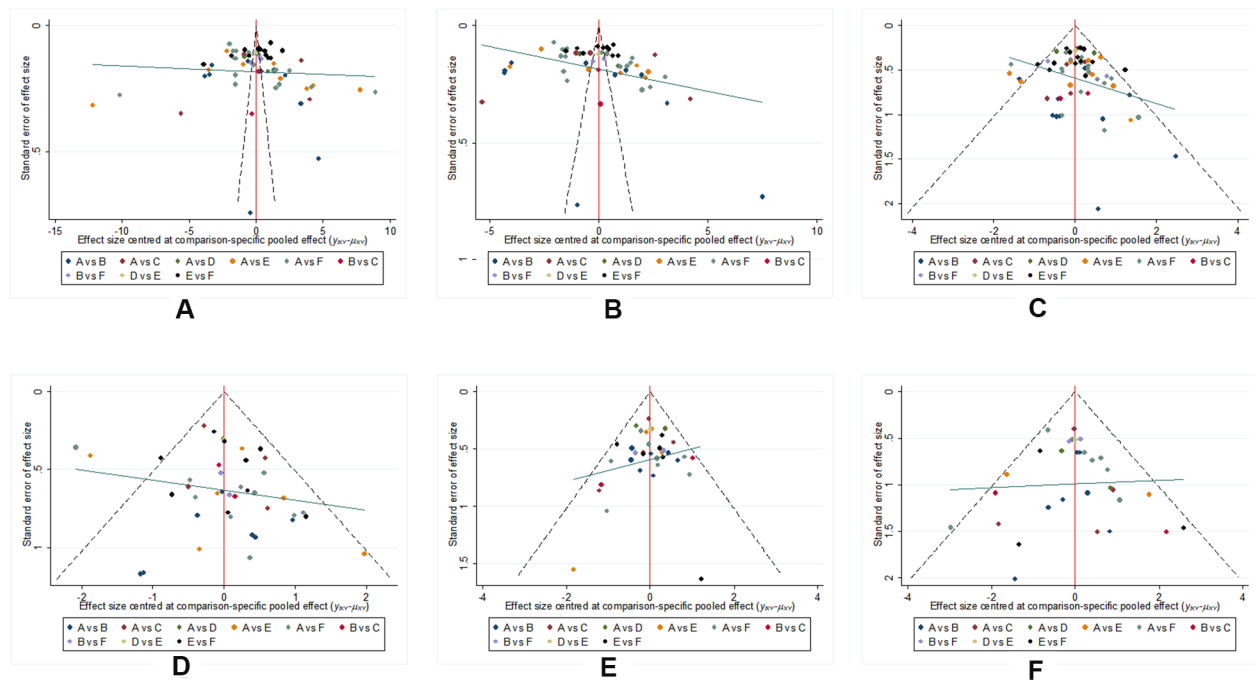

**Supplementary Figure 3. Funnel plots.** (A) The funnel plot of pain relief. (B) The funnel plot of function improvement. (C) The funnel plot of withdrawal related to AEs. (D) The funnel plot of nausea AEs. (E) The funnel plot of headache AEs. (F) The funnel plot of peripheral sensation abnormality AEs.

Testing for inconsistency:

- (1) [<sub>y</sub>\_B]des\_ABC = 0
- (2) [<sub>y</sub>\_B]des\_ABF = 0
- (3) [<sub>y</sub>\_C]des\_AC = 0
- (4) [<sub>y</sub>\_D]des\_ADE = 0
- (5) [<sub>y</sub>\_E]des\_AE = 0
- (6) [<sub>y</sub>\_F]des\_AEF = 0
- (7) [<sub>y</sub>\_E]des\_AEF = 0
- (8) [<sub>y</sub>\_F]des\_AF = 0
- (9) [<sub>y</sub>\_E]des\_EF = 0

chi2( 9) = 15.06  
Prob > chi2 = 0.0894

**A**

Testing for inconsistency:

- (1) [<sub>y</sub>\_B]des\_ABC = 0
- (2) [<sub>y</sub>\_B]des\_ABF = 0
- (3) [<sub>y</sub>\_C]des\_AC = 0
- (4) [<sub>y</sub>\_D]des\_ADE = 0
- (5) [<sub>y</sub>\_E]des\_AE = 0
- (6) [<sub>y</sub>\_F]des\_AEF = 0
- (7) [<sub>y</sub>\_E]des\_AEF = 0
- (8) [<sub>y</sub>\_F]des\_AF = 0
- (9) [<sub>y</sub>\_E]des\_EF = 0

chi2( 9) = 10.35  
Prob > chi2 = 0.3226

**B**

Testing for inconsistency:

- (1) [<sub>y</sub>\_B]des\_ABC = 0
- (2) [<sub>y</sub>\_B]des\_ABF = 0
- (3) [<sub>y</sub>\_C]des\_AC = 0
- (4) [<sub>y</sub>\_D]des\_ADE = 0
- (5) [<sub>y</sub>\_E]des\_AE = 0
- (6) [<sub>y</sub>\_F]des\_AEF = 0
- (7) [<sub>y</sub>\_E]des\_AEF = 0
- (8) [<sub>y</sub>\_F]des\_AF = 0
- (9) [<sub>y</sub>\_E]des\_EF = 0

chi2( 9) = 13.57  
Prob > chi2 = 0.1385

**C**

Testing for inconsistency:

- (1) [<sub>y</sub>\_B]des\_ABC = 0
- (2) [<sub>y</sub>\_B]des\_ABF = 0
- (3) [<sub>y</sub>\_C]des\_AC = 0
- (4) [<sub>y</sub>\_D]des\_ADE = 0
- (5) [<sub>y</sub>\_F]des\_AEF = 0
- (6) [<sub>y</sub>\_E]des\_AEF = 0
- (7) [<sub>y</sub>\_F]des\_AF = 0
- (8) [<sub>y</sub>\_E]des\_EF = 0

chi2( 8) = 7.48  
Prob > chi2 = 0.4863

**D**

Testing for inconsistency:

- (1) [<sub>y</sub>\_B]des\_ABC = 0
- (2) [<sub>y</sub>\_B]des\_ABF = 0
- (3) [<sub>y</sub>\_C]des\_AC = 0
- (4) [<sub>y</sub>\_D]des\_ADE = 0
- (5) [<sub>y</sub>\_F]des\_AEF = 0
- (6) [<sub>y</sub>\_E]des\_AEF = 0
- (7) [<sub>y</sub>\_F]des\_AF = 0
- (8) [<sub>y</sub>\_E]des\_EF = 0

chi2( 8) = 9.07  
Prob > chi2 = 0.3366

**E**

Testing for inconsistency:

- (1) [<sub>y</sub>\_B]des\_ABC = 0
- (2) [<sub>y</sub>\_B]des\_ABF = 0
- (3) [<sub>y</sub>\_C]des\_AC = 0
- (4) [<sub>y</sub>\_D]des\_ADE = 0
- (5) [<sub>y</sub>\_F]des\_AEF = 0
- (6) [<sub>y</sub>\_E]des\_AEF = 0
- (7) [<sub>y</sub>\_F]des\_AF = 0
- (8) [<sub>y</sub>\_E]des\_EF = 0

chi2( 8) = 11.42  
Prob > chi2 = 0.1789

**F**

**Supplementary Figure 4. The details of global inconsistency.** The P (prob> chi<sup>2</sup>) <0.05 would be considered as significant inconsistency. (A) The global inconsistency of pain relief. (B) The global inconsistency of function improvement. (C) The global inconsistency of withdrawal related to AEs. (D) The global inconsistency of nausea AEs. (E) The global inconsistency of headache AEs. (F) The global inconsistency of peripheral sensation abnormality AEs.

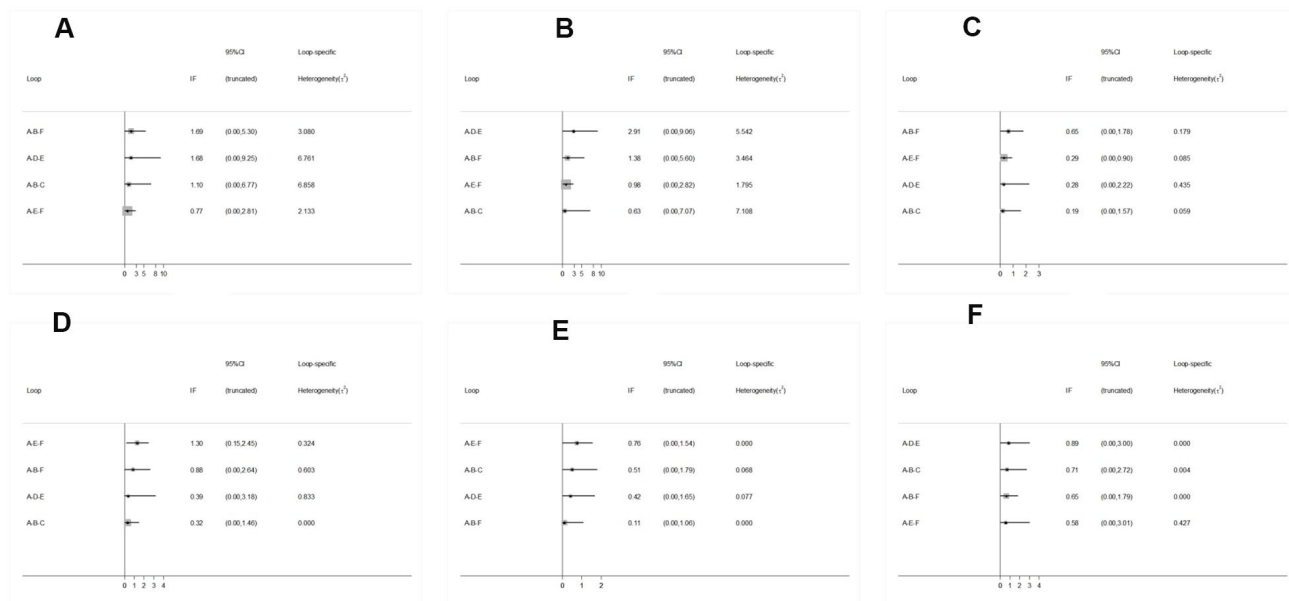

**Supplementary Figure 5. The details of local inconsistency.** (A) The local inconsistency of pain relief. (B) The local inconsistency of function improvement. (C) The local inconsistency of withdrawal related to AEs. (D) The local inconsistency of nausea AEs. (E) The local inconsistency of headache AEs. (F) The local inconsistency of peripheral sensation abnormality AEs.
